# Supplementary material for: HNRNPL Circularizes ARHGAP35 to Produce an Oncogenic Protein
Source: PubMed Central journal article supplement (PMC8261482; doi:10.1002/advs.202001701), 2021-05-01
Supplement: ADVS-8-2001701-s001.pdf [file ADVS-8-2001701-s001.pdf]

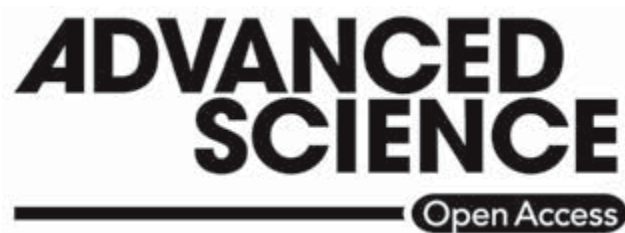

## Supporting Information

for *Adv. Sci.*, DOI: 10.1002/adv.202001701

### HNRNPL Circularizes ARHGAP35 to Produce An Oncogenic Protein

*Yan Li, Bing Chen, Jingjing Zhao, Qin Li, Siyuan Chen, Tianan Guo, Yuchen Li, Hongyan Lai, Zhiao Chen, Zhiqiang Meng, Weijie Guo,\* Xianghuo He,\* and Shenglin Huang\**

Supporting Information

**HNRNPL Circularizes ARHGAP35 to Produce An Oncogenic Protein**

*Yan Li, Bing Chen, Jingjing Zhao, Qin Li, Siyuan Chen, Tianan Guo, Yuchen Li, Hongyan Lai, Zhiao Chen, Zhiqiang Meng, Weijie Guo,\* Xianghuo He,\* and Shenglin Huang\**

*Yan Li, Bing Chen, Jingjing Zhao, Qin Li, Siyuan Chen, Tianan Guo, Yuchen Li, Hongyan Lai, Zhiao Chen, Zhiqiang Meng, Weijie Guo,\* Xianghuo He,\* and Shenglin Huang\**

Dr. Y. Li, B. Chen, J. Zhao, Q. Li, Y. Li, H. Lai, Dr. W. Guo, Prof. S. Huang  
Department of Integrative Oncology  
Fudan University Shanghai Cancer Center  
the Shanghai Key Laboratory of Medical Epigenetics  
Institutes of Biomedical Sciences  
Shanghai Medical College  
Fudan University  
Shanghai 200032, China  
E-mail: slhuang@fudan.edu.cn; guoweijie1986@gmail.com

Dr. Z. Chen, Prof. X. He  
Fudan University Shanghai Cancer Center and Institutes of Biomedical Sciences  
Shanghai Medical College  
Fudan University  
Shanghai 200032, China  
E-mail: xhhe@fudan.edu.cn

S. Chen  
Department of Medical Oncology  
Fudan University Shanghai Cancer Center  
Shanghai Medical College  
Fudan University  
Shanghai 200032, China

T. Guo,  
Department of Colorectal Surgery  
Fudan University Shanghai Cancer Center  
Shanghai Medical College  
Fudan University  
Shanghai 200032, China

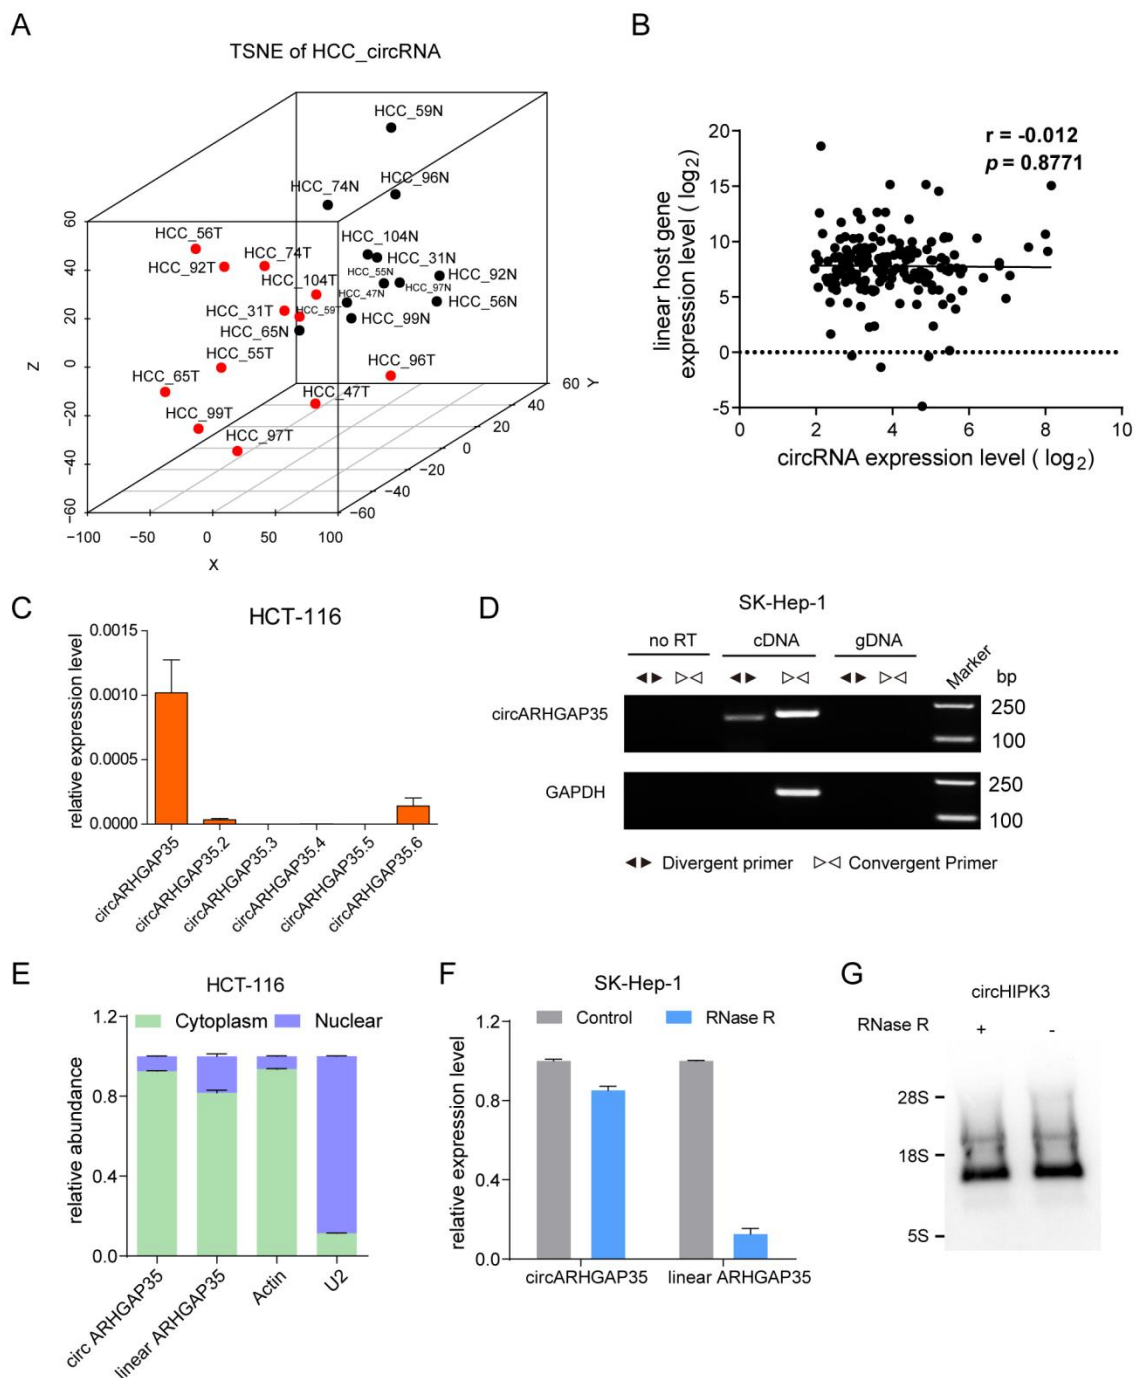

**Figure S1.** Identification of circRNAs in cancer tissues. A) Multidimensional scaling analysis for circRNAs in tumor (T) tissues and adjacent non-tumor (N) tissues. Red dots and black dots represented circRNAs in tumor tissues and adjacent non-tumor tissues, respectively. B) The Pearson's correlation of circRNA versus linear host gene expression. C) The expression of six circular ARHGAP35 isoforms in HCT-116 cells. Data were represented as mean  $\pm$  SEM. D) Validation for the formation of circARHGAP35 in SK-Hep-1 cells. Divergent primers amplified the circular RNA in cDNA but not in genomic DNA (gDNA). Convergent primers spanning exons were used to detecte specific linear RNA. GAPDH was used as a

linear RNA control. E) qRT-PCR analysis of circARHGAP35 and linear ARHGAP35 RNA expression in the cytoplasm or nucleus of HCT-116 cells. F) qRT-PCR analysis of circARHGAP35 and linear ARHGAP35 RNA expression in the cytoplasm or nucleus of SK-Hep-1 cells. G) Northern blot for circHIPK3, which we reported previously (Zheng, et al., Nat Commun. 2016, PMID: 27050392), as a positive control, with or without RNase R treatment using a specific probe.

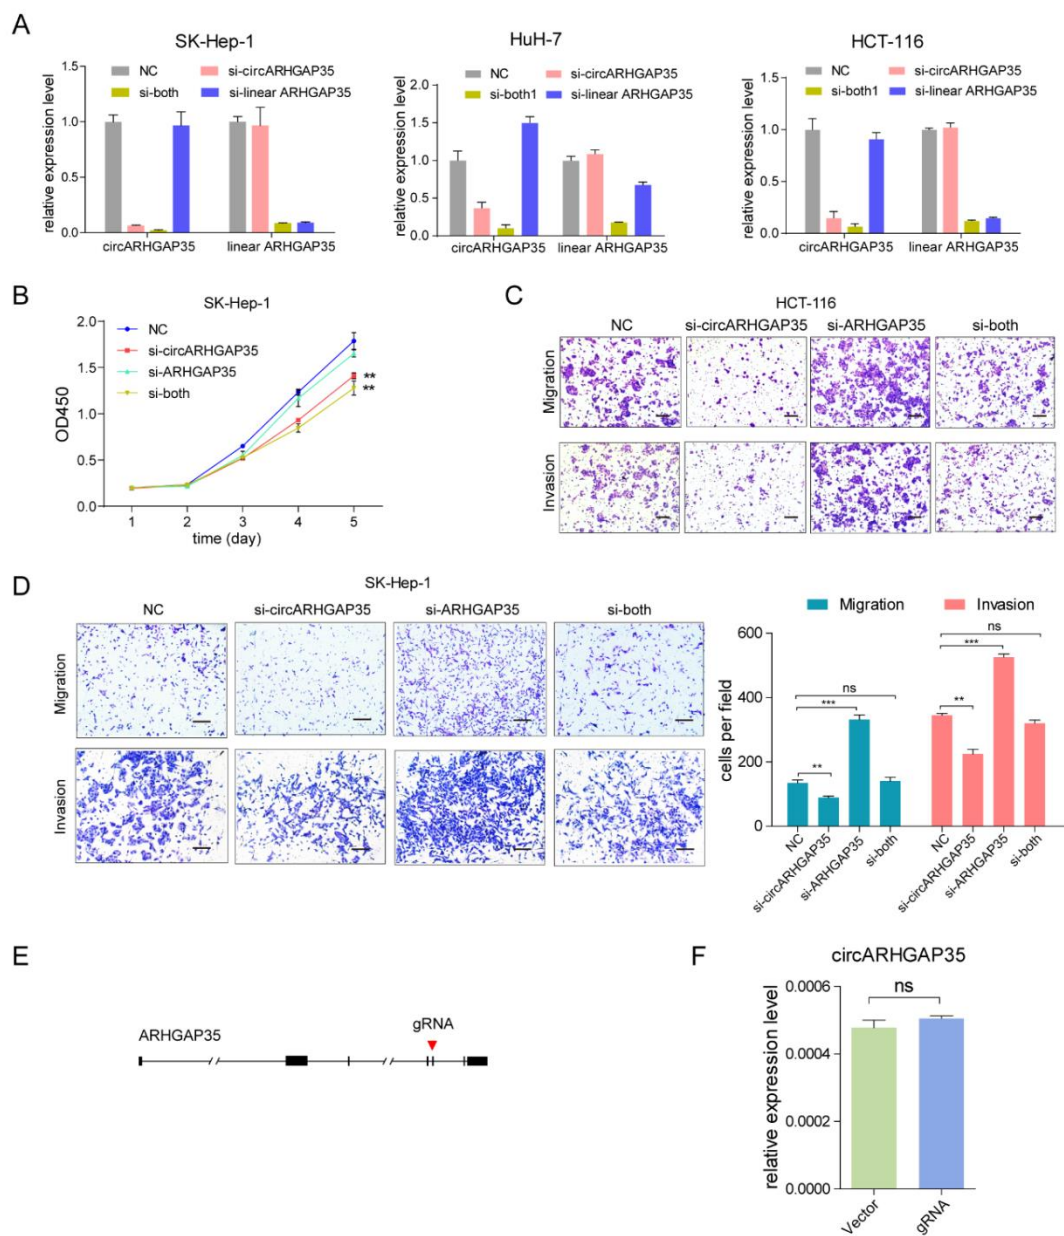

**Figure S2.** circARHGAP35 and linear ARHGAP35 have antithetical functions *in vitro*. **(A)** qRT-PCR analysis of the interference efficiencies after treatment with the siRNAs specifically targeting the back-splice junction of circARHGAP35, the ARHGAP35 linear transcript and both transcript in SK-Hep-1, HuH-7 and HCT-116 cells. **(B)** CCK-8 proliferation assay of SK-Hep-1 cells transfected with control or indicated siRNAs. **(C, D)** Transwell migration and invasion assays of HCT-116 (C) and SK-Hep-1(D) cells were performed after transfection of control or indicated siRNAs. Scale bars, 10  $\mu$ m. **(E)** The position of gRNA targeting linear ARHGAP35 transcript. **(F)** The expression of circARHGAP35 after linear ARHGAP35 transcript was specifically knocked down by the CRISPR/Cas9 technology. Data were represented as mean  $\pm$  SEM and representative of at least 3 independent experiments. Two-way ANOVA and Tukey post hoc test were performed for (B); one-way ANOVA and Dunnett post hoc test were performed for (D); unpaired Student's t tests were performed for (F). \*P < 0.05; \*\*P < 0.01; \*\*\*P < 0.001.

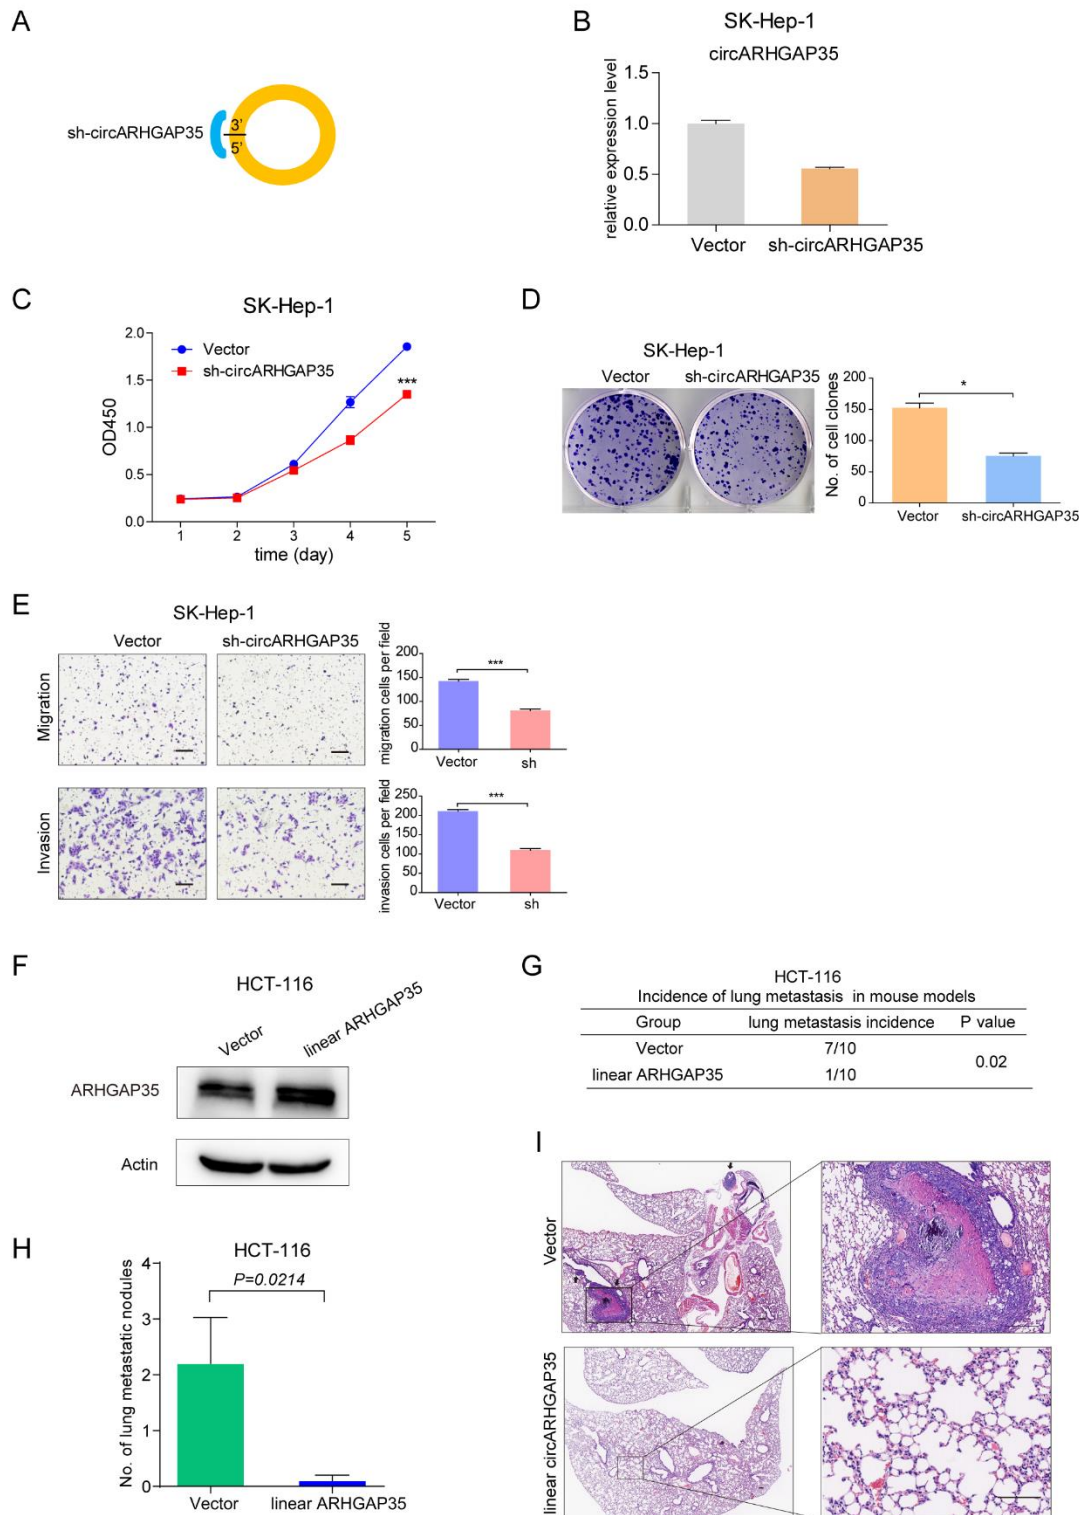

**Figure S3.** The functions of circARHGAP35 and linear ARHGAP35 *in vitro* and *in vivo*. A) Schematic representation of shRNA targeting circARHGAP35 at the back-splice junction. B) The relative expression of circARHGAP35 was determined by qRT-PCR in SK-Hep-1 cells infected with either shRNA expressing lentivirus or vector control lentivirus. C) CCK-8

proliferation assay in SK-Hep-1 cells after knockdown of circARHGAP35 by shRNA. D) Cloning formation assay after knockdown of circARHGAP35 by shRNA. E) Transwell migration and invasion assays of SK-Hep-1 cells after knockdown of circARHGAP35 by shRNA. Scale bars, 10  $\mu\text{m}$ . F) Western blot analysis of ARHGAP35 protein level in HCT-116 cells infected with either linear ARHGAP35 expressing lentivirus or vector control lentivirus. G) The effect of linear ARHGAP35 on tumor metastasis in mouse tail vein injection model. The linear ARHGAP35 overexpression group or vector control group were injected into the tail vein of each nude mouse (n=10). Statistical analysis of the differences between the two groups was performed using the  $\chi^2$  test. H,I) Hematoxylin-eosin-stained sections of lung metastatic nodules formed in the two groups. Slides were examined by an expert pathologist. The number of metastatic nodules in the lungs of the two groups were counted and analyzed (H). Black arrows indicate the nodules formed in the lung (I). Scale bars, 200  $\mu\text{m}$ . Shown were representative images. Data were represented as mean  $\pm$  SEM and representative of at least three independent experiments. Two-way ANOVA and Tukey post hoc test were performed for (C); one-way ANOVA and Dunnett post hoc test were performed for (D, E); unpaired Student's t tests were performed for (H). \*P < 0.05; \*\*P < 0.01; \*\*\*P < 0.001.



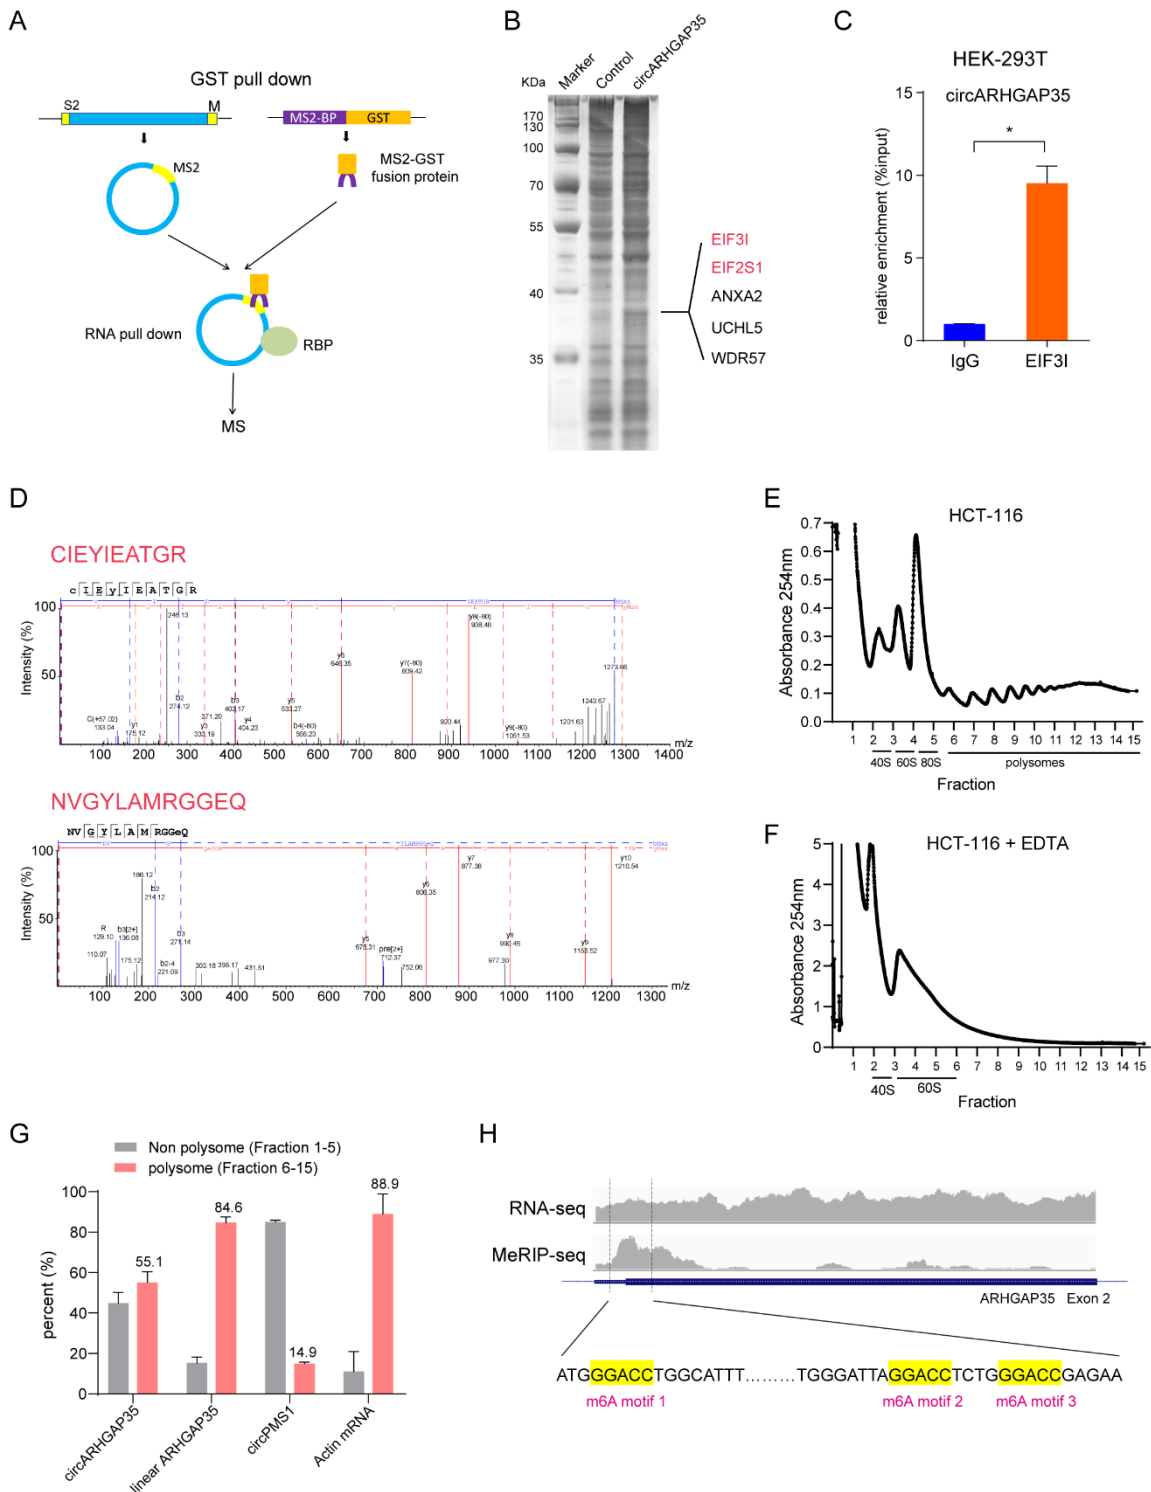

**Figure S4.** circARHGAP35 encodes a protein. A) Schematic of circARHGAP35 MS2-GST RNA pulldown assay. circARHGAP35 was tagged with MS2 hairpins. The plasmid p-MS2-circARHGAP35 or control plasmid was co-transfected with plasmid expressing MS2-GST fusion protein (contains MS2 binding protein which recognizes MS2 RNA, GST tag which recognizes glutathione-SH and a cytoplasmic localization signal) in HEK-293T cells. After 48 hours, cells were lysed and the complexes were affinity-purified by using GSH magnetic beads, followed by mass spectrometry. B) The immunoprecipitated protein sample was

subject to SDS-PAGE and mass spectrometry analysis to identify proteins interacting with circARHGAP35. C) RIP assay using anti-EIF3I antibody. The percentage of RIP-enriched circARHGAP35 relative to the input value was calculated by qRT-PCR. Nonspecific IgG was used as an isotype negative control. Statistical analysis was performed using unpaired Student's t tests. \* $P < 0.05$ . D) Endogenous circARHGAP35 protein was identified by mass spectrometry analysis after immunoprecipitation assay. The amino acid sequences (red letters) represent the peptides of circARHGAP35 protein. E) Representative polysome profile prepared from HCT-116 cell cytoplasmic extracts using a linear 15% to 50% sucrose gradient. The polysomes of HCT-116 cell cytoplasmic extracts were fractionated using sucrose density gradient centrifugation. Absorbance at 254 nm was measured. F) Representative polysome profile after EDTA treatment. G) The distribution of circARHGAP35, linear ARHGAP35, circPMS1 and Actin mRNA in polysomes (Fraction 6-15) and non-polysomes (Fraction 1-5). H) The m<sup>6</sup>A RNA immunoprecipitation sequencing (meRIP-seq) data around the circARHGAP35 loci adjacent to the translation start site. A significant peak and three RRACH fragments (R = G or A; H = A, C or U) are present at the start codon. Data were represented as mean  $\pm$  SEM. Results were performed at least three independent experiments.

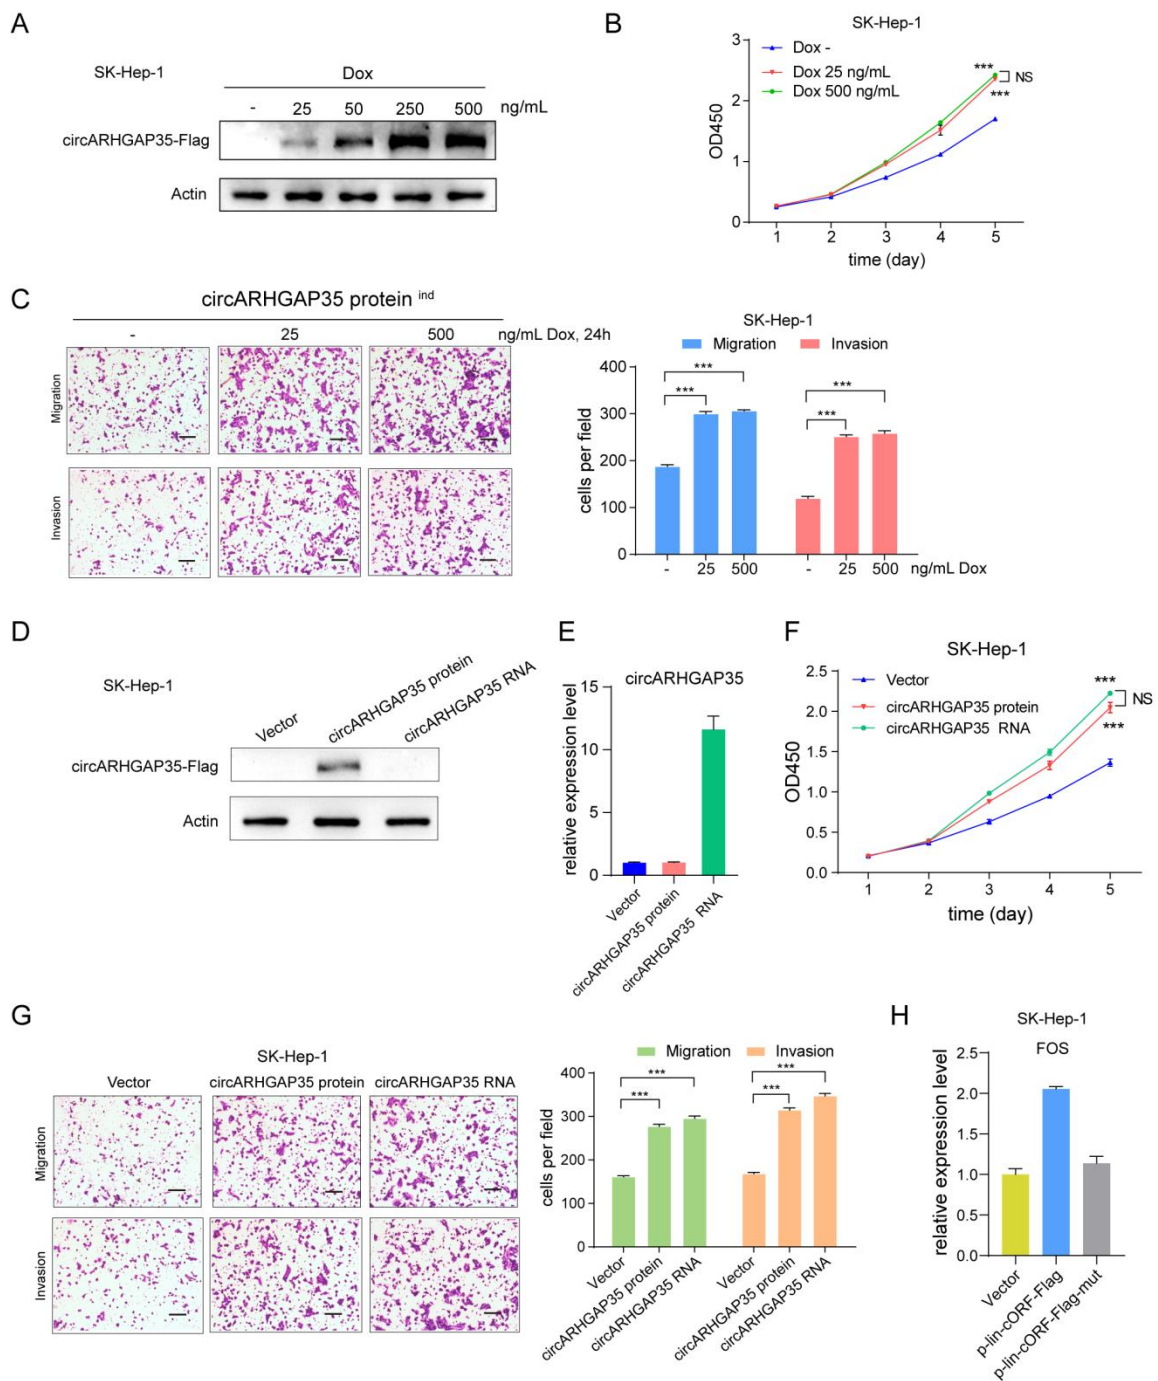

**Figure S5.** circARHGAP35 encodes a functional protein. A) circARHGAP35 protein was detected by western blot analysis after treatment with different concentrations of Doxycycline (Dox) in inducible SK-Hep-1 cells which were infected with pTRIPZ-circARHGAP35-ORF lentivirus. ‘-’ means no Dox treatment. B, C) CCK-8 proliferation assays (B), and transwell migration and invasion assays (C) of inducible SK-Hep-1 cells after treatment with indicated Dox concentrations. Scale bars, 10  $\mu$ m. D) Western blot validation of circARHGAP35 protein following stable overexpression of circARHGAP35 protein or RNA. circARHGAP35 protein was overexpressed by Dox treatment (25ng/mL) in inducible SK-Hep-1 cells.

circARHGAP35 RNA was overexpressed by infected with p-circARHGAP35 lentivirus. E) The expression of circARHGAP35 RNA was validated by qRT-PCR. F, G) CCK-8 proliferation assays (F), and transwell migration and invasion assays (G) after overexpression of circARHGAP35 protein or RNA. Scale bars, 10  $\mu$ m. H) qRT-PCR analysis of FOS mRNA level in SK-Hep-1 cells infected with circARHGAP35 protein vector lentivirus (p-lin-cORF-Flag), mutant vector lentivirus (p-lin-cORF-Flag-mut) or vector control lentivirus. Data were represented as mean  $\pm$  SEM. Results were performed at least three independent experiments; two-way ANOVA and Tukey post hoc test were performed for (B) and (F); one-way ANOVA and Dunnett post hoc test were performed for (C), (G). \* $P < 0.05$ ; \*\* $P < 0.01$ ; \*\*\* $P < 0.001$ .

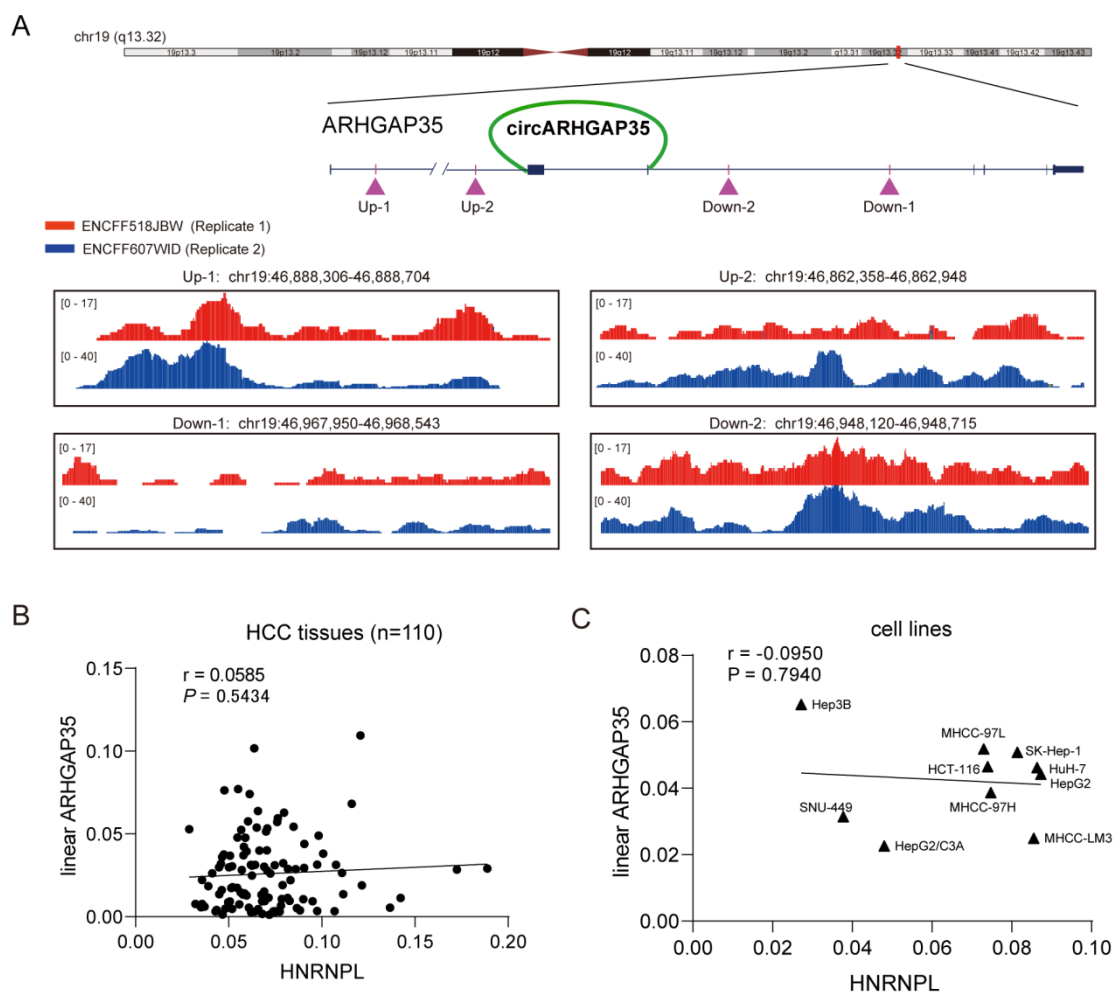

**Figure S6.** HNRNPL regulates circARHGAP35 formation. A) HNRNPL binding sites flanking the circARHGAP35 locus. B) Correlation between linear ARHGAP35 and HNRNPL in 110 HCC samples was determined by qRT-PCR with  $\beta$ -actin serving as an internal control. Statistical analysis was performed with Pearson's correlation analysis. C) Correlation between linear ARHGAP35 and HNRNPL in cancer cell lines. Statistical analysis was performed with Pearson's correlation analysis.

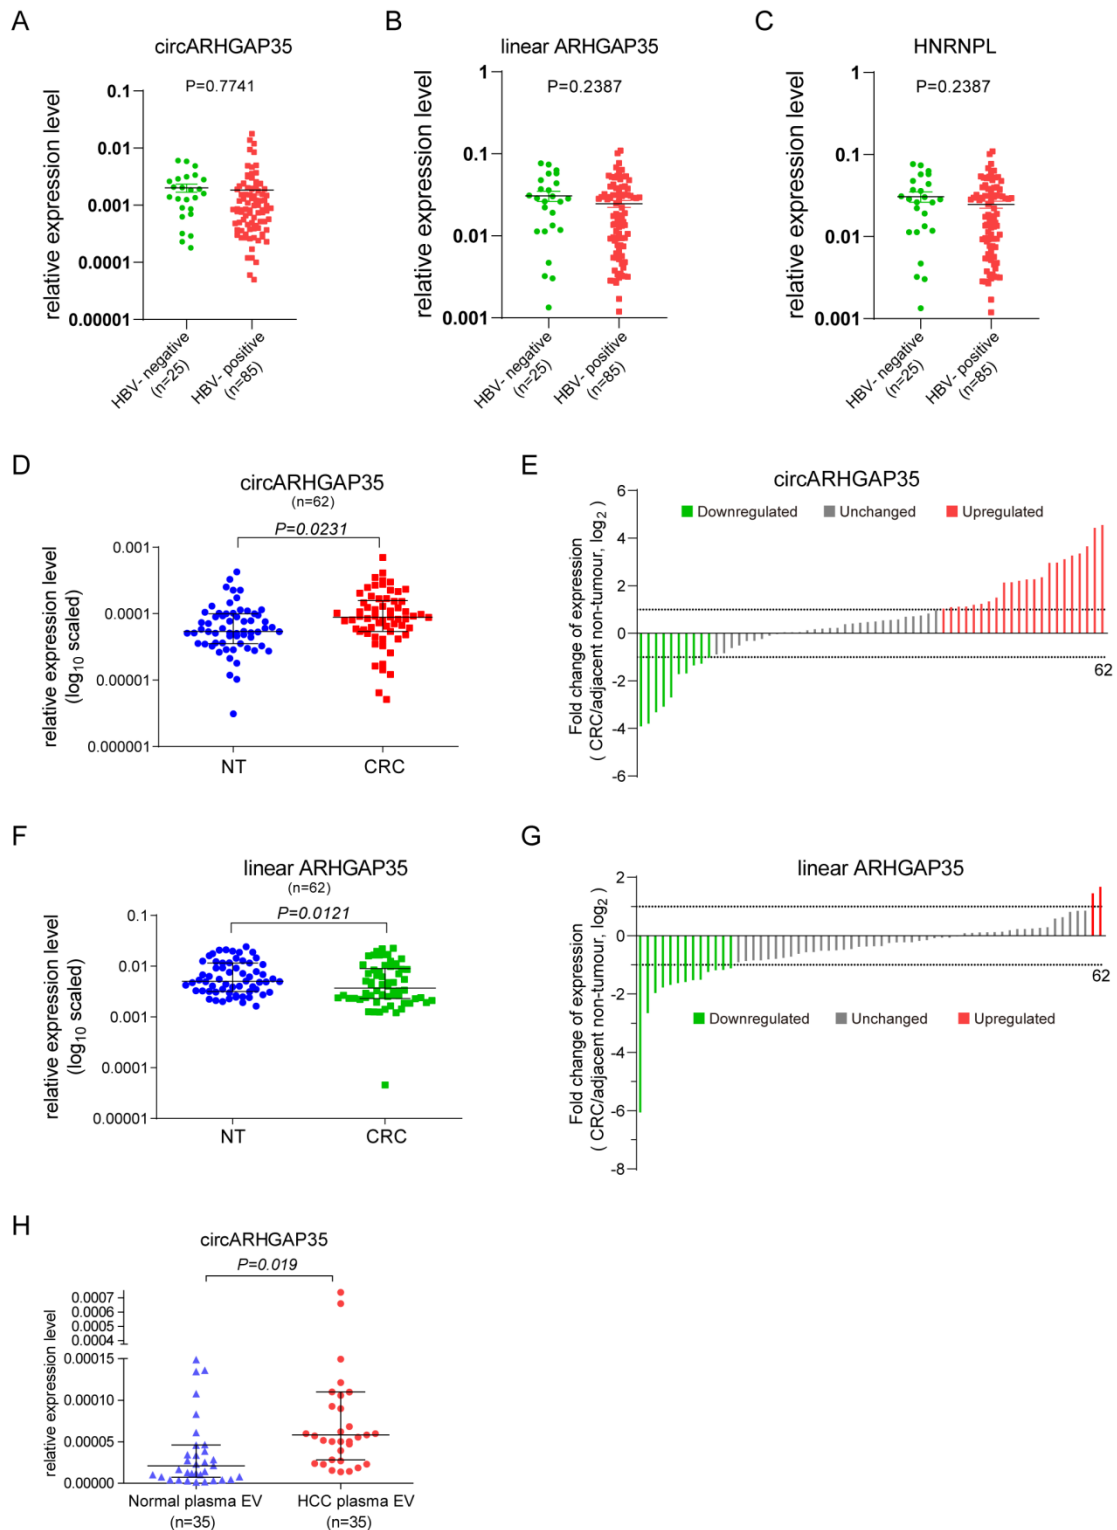

**Figure S7.** The expression of circARHGAP35 and linear ARHGAP35 in cancer patient samples. A-C) The expression of circARHGAP35(A), linear ARHGAP35(B) and HNRNPL(C) in HBV-positive or HBV-negative HCC samples. Data were analyzed by unpaired Student's t tests. D) The expression of circARHGAP35 in 62 paired CRC and

adjacent non-tumour (NT) cancer tissues. Data were analyzed by paired Student's t-test, n=62. E) The fold change of circARHGAP35 expression in 62 paired HCC samples (downregulated, green; unchanged, gray; upregulated, red). F) The expression of linear ARHGAP35 in 62 paired CRC and adjacent non-tumour (NT) cancer tissues. Data were analyzed by paired Student's t-test, n=62. G) The fold change of linear ARHGAP35 expression in 62 paired HCC samples (downregulated, green; unchanged, gray; upregulated, red). H) qRT-PCR analysis of circARHGAP35 levels in plasma EVs of HCC patients and healthy people (n = 35, respectively). Data were analyzed by unpaired Student's t tests.

Figure 1G

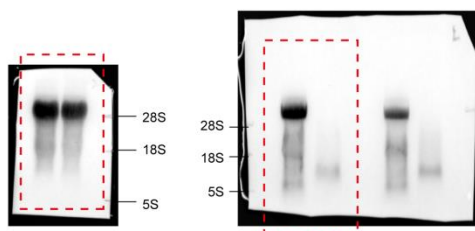

Figure 2E

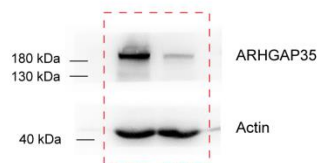

Figure 3C

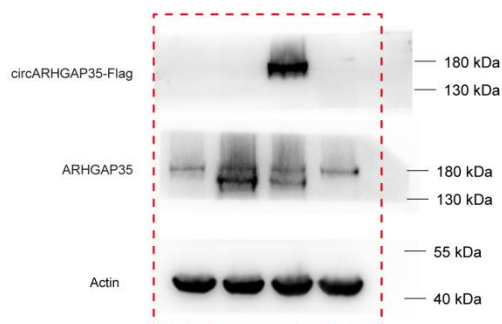

Figure 3K

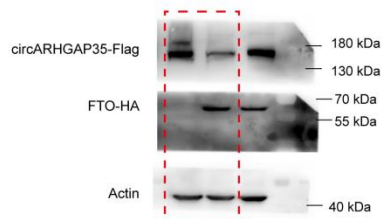

Figure 4B

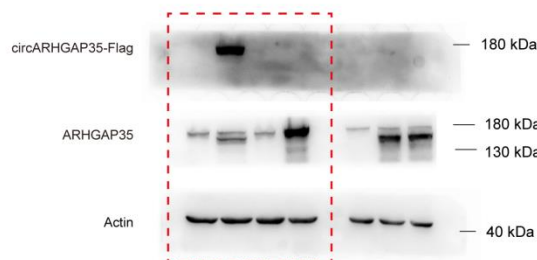

Figure 5C

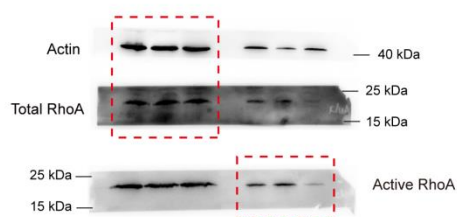

Figure 5F

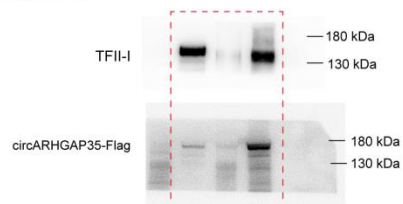

Figure 5G

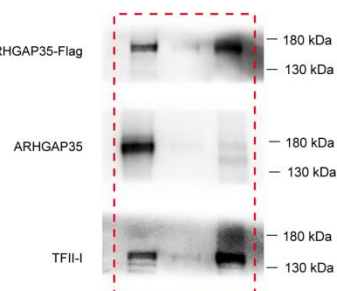

Figure 5H

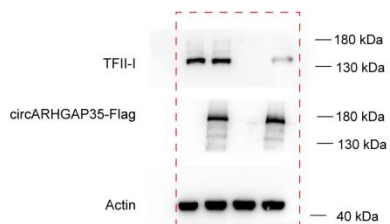

Figure S8. Uncropped blots of related figures.

**Table S1. Correlation of the Clinicopathological Features With circARHGAP35**

|                                       | n   | circARHGAP35 expression |                  | $\chi^2$ | P Value |
|---------------------------------------|-----|-------------------------|------------------|----------|---------|
|                                       |     | High<br>(>Median)       | Low<br>(<Median) |          |         |
| <b>Gender</b>                         |     |                         |                  |          |         |
| Male                                  | 92  | 46                      | 46               |          |         |
| Female                                | 18  | 9                       | 9                | 0        | 1       |
| <b>Liver cirrhosis</b>                |     |                         |                  |          |         |
| yes                                   | 87  | 45                      | 42               |          |         |
| no                                    | 22  | 9                       | 13               | 1.831    | 0.4     |
| unknown                               | 1   | 1                       | 0                |          |         |
| <b>Family history of liver cancer</b> |     |                         |                  |          |         |
| yes                                   | 8   | 4                       | 4                |          |         |
| no                                    | 102 | 51                      | 51               | 0        | 1       |
| <b>HBsAg</b>                          |     |                         |                  |          |         |
| Positive                              | 87  | 39                      | 48               |          |         |
| Negative                              | 23  | 16                      | 7                | 4.453    | 0.035*  |
| <b>Tumor embolus</b>                  |     |                         |                  |          |         |
| yes                                   | 48  | 25                      | 23               |          |         |
| no                                    | 62  | 30                      | 32               | 0.148    | 0.701   |
| <b>Tumor capsule</b>                  |     |                         |                  |          |         |
| yes                                   | 57  | 29                      | 28               |          |         |
| no                                    | 53  | 26                      | 27               | 0.036    | 0.849   |
| <b>Tumor size (cm)</b>                |     |                         |                  |          |         |
| > 5                                   | 56  | 34                      | 22               |          |         |
| ≤5                                    | 54  | 21                      | 33               | 5.238    | 0.022*  |
| <b>Tumor No.</b>                      |     |                         |                  |          |         |
| 1                                     | 92  | 43                      | 49               |          |         |
| > 1                                   | 18  | 12                      | 6                | 2.391    | 0.122   |
| <b>Serum AFP (ng/ml)</b>              |     |                         |                  |          |         |
| ≤20                                   | 35  | 13                      | 22               |          |         |
| >20                                   | 75  | 42                      | 33               | 3.394    | 0.065   |
| <b>Age (years)</b>                    |     |                         |                  |          |         |
| ≤50                                   | 55  | 25                      | 30               |          |         |
| > 50                                  | 55  | 30                      | 25               | 0.909    | 0.34    |
| <b>GGT</b>                            |     |                         |                  |          |         |
| ≤54 U/L                               | 39  | 16                      | 23               |          |         |
| >54 U/L                               | 71  | 39                      | 32               | 1.947    | 0.163   |
| <b>TNM stage</b>                      |     |                         |                  |          |         |
| I + II                                | 83  | 40                      | 43               |          |         |
| III + IV                              | 26  | 15                      | 11               | 0.715    | 0.398   |
| <b>BCLC stage</b>                     |     |                         |                  |          |         |
| 0 + A                                 | 18  | 7                       | 11               |          |         |
| B+C+D                                 | 92  | 48                      | 44               | 1.063    | 0.303   |

\*,  $\chi^2$  test, P<0.05.



**Table S2. Correlation of the Clinicopathological Features With linear ARHGAP35 Expression in HCC**

|                                       | n   | ARHGAP35 expression |                  | $\chi^2$ | P Value |
|---------------------------------------|-----|---------------------|------------------|----------|---------|
|                                       |     | High<br>(>Median)   | Low<br>(<Median) |          |         |
| <b>Gender</b>                         |     |                     |                  |          |         |
| Male                                  | 92  | 43                  | 49               | 2.391    | 0.122   |
| Female                                | 18  | 12                  | 6                |          |         |
| <b>Liver cirrhosis</b>                |     |                     |                  |          |         |
| yes                                   | 87  | 45                  | 42               | 1.285    | 0.526   |
| no                                    | 22  | 10                  | 12               |          |         |
| unknown                               | 1   | 0                   | 1                |          |         |
| <b>Family history of liver cancer</b> |     |                     |                  |          |         |
| yes                                   | 8   | 5                   | 3                | 0.539    | 0.463   |
| no                                    | 102 | 50                  | 52               |          |         |
| <b>HBsAg</b>                          |     |                     |                  |          |         |
| Positive                              | 87  | 41                  | 46               | 1.374    | 0.241   |
| Negative                              | 23  | 14                  | 9                |          |         |
| <b>Tumor embolus</b>                  |     |                     |                  |          |         |
| yes                                   | 48  | 21                  | 27               | 1.331    | 0.249   |
| no                                    | 62  | 34                  | 28               |          |         |
| <b>Tumor capsule</b>                  |     |                     |                  |          |         |
| yes                                   | 57  | 30                  | 27               | 0.328    | 0.567   |
| no                                    | 53  | 25                  | 28               |          |         |
| <b>Tumor size (cm)</b>                |     |                     |                  |          |         |
| > 5                                   | 56  | 29                  | 27               | 1.146    | 0.703   |
| ≤5                                    | 54  | 26                  | 28               |          |         |
| <b>Tumor No.</b>                      |     |                     |                  |          |         |
| 1                                     | 92  | 48                  | 44               | 1.063    | 0.303   |
| > 1                                   | 18  | 7                   | 11               |          |         |
| <b>Serum AFP (ng/ml)</b>              |     |                     |                  |          |         |
| ≤20                                   | 35  | 17                  | 18               | 0.042    | 0.838   |
| >20                                   | 75  | 38                  | 37               |          |         |
| <b>Age (years)</b>                    |     |                     |                  |          |         |
| ≤50                                   | 55  | 24                  | 31               | 1.782    | 0.182   |
| > 50                                  | 55  | 31                  | 24               |          |         |
| <b>GGT</b>                            |     |                     |                  |          |         |
| ≤54 U/L                               | 39  | 25                  | 14               | 4.807    | 0.028*  |
| >54 U/L                               | 71  | 30                  | 41               |          |         |
| <b>TNM stage</b>                      |     |                     |                  |          |         |
| I + II                                | 83  | 44                  | 39               | 1.677    | 0.195   |
| III + IV                              | 26  | 10                  | 16               |          |         |
| <b>BCLC stage</b>                     |     |                     |                  |          |         |
| 0 + A                                 | 18  | 9                   | 9                | 0        | 1       |
| B+C+D                                 | 92  | 46                  | 46               |          |         |

\*,  $\chi^2$  test,  $P < 0.05$ .

**Table S3. Primers and RNA sequences used in this study**

|                                                                  |          | Forward primer(5'-3')    | Reverse primer(5'-3')    |
|------------------------------------------------------------------|----------|--------------------------|--------------------------|
| <b>43 candidate circular RNAs and corresponding linear mRNAs</b> |          |                          |                          |
| FGA                                                              | Circular | GTTGCAGTCCCTCCAGTC       | AAGCTGGAAGTCTGGGAG       |
|                                                                  | Linear   | TGTCAGAGACTGTGATGATGTCC  | TACTGGATCCCGGTAGCTTG     |
| MARK4                                                            | Circular | AGTTGAAGCCATACACA        | AGGATGCTCTCACAGTC        |
|                                                                  | Linear   | GAAGGAAGCTCGAGCCAAGT     | GTTCTCAGCCTTCAGGTCCC     |
| GSE1                                                             | Circular | CCAAACAGGCGGAGGAG        | GTCCGGTGGAAAGCAT         |
|                                                                  | Linear   | GCAGCCCGGGTGAGATAAG      | CAGTCCACCTCCGGTGATA      |
| SLC41A2                                                          | Circular | GCAGATGAATCAGAACC        | TGTAGAAGTGACCCCAA        |
|                                                                  | Linear   | GCCAAACATCCAGCCACAAG     | CTAGCCTGAATGGCCACCAA     |
| NNT                                                              | Circular | AAAGCTCAATACCCCAT        | AGCCTCCAAGAATCACA        |
|                                                                  | Linear   | GGGAGAAGCAAATGTGTCCCT    | TTTGGGGACTCCAACAGTCA     |
| UGP2                                                             | Circular | AAGACCTGGATGGATTTC       | ACATTGCTTTGCTAAGAT       |
|                                                                  | Linear   | GCTCAAGGTGTGCATGTGTG     | GCTTTGCTAAGATCTTCTCTTCC  |
| SMC3                                                             | Circular | CGAGACCCAGCAAAGGAAA      | CCCCAGTTAGAGCACCCC       |
|                                                                  | Linear   | CCAACACAGGGTTTCAGTGT     | TAGCCTCCAGCACTTTGTGACG   |
| SMARCA5                                                          | Circular | ATGGATACAGAGTCAAGTG      | ATCTTCATCAGTGATCTCA      |
|                                                                  | Linear   | CCAACACAGGGTTTCAGTGT     | TAGCCTCCAGCACTTTGTGACG   |
| REPS1                                                            | Circular | GATCTGCAGCTAAAGAGTT      | GAGGTGGAGGTGGGGAATG      |
|                                                                  | Linear   | GCAGGGGGCAAGTGAAAAAG     | ATGCAGGTTCTGTGCATCT      |
| ZKSCAN1                                                          | Circular | CGCTTCAGGCGCTTCTGT       | TTGCGAGCATCTCAGGTC       |
|                                                                  | Linear   | TCCCAGGACATAAAGGCTGC     | CCTGTAGGGTGGAAATCTGTC    |
| TMEM56                                                           | Circular | GGAAAGTGATTGGTGAC        | AGCAGTTTTGTGTTGAT        |
|                                                                  | Linear   | CTGAACCCAGCACCATCAGT     | CAACCAGATCGCCAGTCAT      |
| KDM8                                                             | Circular | AATGGTCCCAGACCCCTC       | CTGCTCCCTGAAATGCT        |
|                                                                  | Linear   | CCAAACGCAACGAGTCTTCG     | CTTTCTCCCGAGGTCCAAC      |
| PPP6R2                                                           | Circular | GGTGAGCCTCATCACACAG      | GCAAAACAGAAAAACATTT      |
|                                                                  | Linear   | AGTGTTTGATGAGCCAGCGA     | TGACTCGGAGCAGCAGAAAAG    |
| MASP2                                                            | Circular | ACTCCCAGTCTGTGAGCC       | TCCAGGACCTGTGATGTA       |
|                                                                  | Linear   | AGGTCACCTGCCCCGAAAT      | CACAGTCAACAATGCTGCACG    |
| VEZT                                                             | Circular | CTTTACTAACCTCGTGAG       | GTATTTTGGTAGGACTCTT      |
|                                                                  | Linear   | GCACAACAGAGGGACAA        | AAGCATAACGAGCAAGC        |
| ANKIB1                                                           | Circular | CTTCAGGCTCCTCTCTTTA      | ATTTGGTGGTTGTATTTC       |
|                                                                  | Linear   | GAGCTCATGACTGGGACAGG     | TGGTGGTGGAGTTGGCATT      |
| AFTPH-F                                                          | Circular | TCGAATGATGTCTGGCTCC      | CCAAAACGCACAGTGTACC      |
|                                                                  | Linear   | CAGTTCCGCGTCGGAATAGA     | TTTACACCTGGCTCCTTCGG     |
| CPSF6                                                            | Circular | AGTCGACGCATAAATCCC       | CCACATCATACCAACAGT       |
|                                                                  | Linear   | TGATGCCAGTGTGGTGATT      | TCACGCTTGATCCAGAACCA     |
| FBXL5                                                            | Circular | GGAAATCGTTGTTGTTGGA      | CCTTTGCGTATTGTGGTCA      |
|                                                                  | Linear   | GCCCTTTCCTGAAAGTGGGA     | GAGCACGGAATCGTTGTTGT     |
| FGGY                                                             | Circular | AGAGAGATTTGCTGGGATA      | GGTTGACTGGTAATGGGTG      |
|                                                                  | Linear   | ACTAAAGGGCATGGTCACCG     | AAGGGGATTCTGTGAGGC       |
| KLHL8                                                            | Circular | CAACAGCACCAGCAAATAA      | AAAGGGTAGAGAGAAGGCA      |
|                                                                  | Linear   | GCCATTGTTGCCGTTGATT      | ACACAAAACAGCACACCAGC     |
| FOCAD                                                            | Circular | TTCTCTCTCGCTGTGTGA       | AGGCTGTGCTTTTTTTGTA      |
|                                                                  | Linear   | TTCCATCCACACAGATTAGCAGTT | TGCAACACTTCTCCCACAGC     |
| PTGR1                                                            | Circular | AGAAATGGAGTGCCTTG        | AGGACTTGCTGAAATGG        |
|                                                                  | Linear   | AAGGAGATGCCCGCCAAAAA     | TTCCCTTCATTTTTCTGCTTTGAA |
| DEK                                                              | Circular | AAAAGTTGAAGAAACCCC       | TTGTGCAATTGTAATGGC       |
|                                                                  | Linear   | TCTCTTCCTTACAGAGAGAGCCA  | AAGCCACTGAACTGACCCAC     |
| GDI2                                                             | Circular | AAAGCCCATACCTTTATCC      | AGTCTCTTCTCTCCCCAT       |
|                                                                  | Linear   | TCGCCAGCTCCATTTCTCTC     | AGATGCACTCTCTCTCCGT      |
| PI4KB                                                            | Circular | CTCCCTCCAAAAGGACTCA      | GGCAGGCTCCACTACTGTA      |
|                                                                  | Linear   | GCAACTGCAGTCCATTTGGG     | GCAAGGAGAGCTGTGACTGT     |
| TMEM181                                                          | Circular | CAGTGATAGTGGGATTGA       | GCTTGGAGAGCGGTGTAGAG     |
|                                                                  | Linear   | CCTGGCCAAAAGGGAAGTTGT    | CGGACAGGTCCACAACCTGAA    |
| ARHGAP35                                                         | Circular | AAACCAAAGCCAAAACCCC      | ACCACCTCTCATCGCCAAA      |
|                                                                  | Linear   | GTCAGCGGGAACAAGTCTGA     | GCTCCCGTCTGTTGATTTG      |
| FANCL                                                            | Circular | GTTCTACTCAAGCCTTATT      | TCTTCAGGCAACACTATC       |

|                                       |          |                                                                                     |                                                                                                 |
|---------------------------------------|----------|-------------------------------------------------------------------------------------|-------------------------------------------------------------------------------------------------|
|                                       | Linear   | GGTAAATTCTCCTCAGAGCTCCTT                                                            | CTGGCTCAAGTACCCAGGTC                                                                            |
| LIFR                                  | Circular | TATTGTCCACCATCCAGG                                                                  | ACCGCTCAAATGTTATCT                                                                              |
|                                       | Linear   | GTTGCTGGGACTGAATACCCT                                                               | AGCCATTCAATCACGTGTGC                                                                            |
| SOX5                                  | Circular | CTTGTCTTTCCAGTCCTT                                                                  | ACAAAATCAATTTGCTCC                                                                              |
|                                       | Linear   | GGAGACGATCATAGGTGGCT                                                                | AGCCCGTCACTCTCCTCTTC                                                                            |
| CNN2                                  | Circular | CTGTTTGAGAGTGGGAA                                                                   | GAGCGGTTGATCTTGGG                                                                               |
|                                       | Linear   | ATCAACCGCTCCATGCAGAA                                                                | CGAGAAGAGACACCTGCACC                                                                            |
| RBM23                                 | Circular | ATCAGATGCCATCCTGTC                                                                  | TTATCCTAGCAATACCACC                                                                             |
|                                       | Linear   | GAAGGTTCTGGAAGACGGCA                                                                | GTCAGATCAGTTCGGGTCC                                                                             |
| ARHGEF12                              | Circular | TAAAAGAGGAGCAGCATG                                                                  | ATTCACCTTCCAAACCAA                                                                              |
|                                       | Linear   | TTCTGTTTTCTGGGGTCTGGG                                                               | GGCTCCTCGACTCCTCAACT                                                                            |
| RHOBTB3                               | Circular | TCGTTGGGAAGAATTGGA                                                                  | TGTGACGCTTCAGCCTTT                                                                              |
|                                       | Linear   | AGGCAACCCACCATTACGAG                                                                | TCCCACTGAAAAGCACCTGA                                                                            |
| C3                                    | Circular | TCTGGGAACTCACTTCGG                                                                  | GTGGGAGATTCTGGCTGT                                                                              |
|                                       | Linear   | CAAGCGCATTCCGATTGAGG                                                                | CCTGAGTGCAAGATGACGGT                                                                            |
| ENPP1                                 | Circular | GCCTCAAGTCTGGCACAT                                                                  | AGCATTCAATTTGGGATC                                                                              |
|                                       | Linear   | CAGCATTGTCACCGATTGT                                                                 | GCCAGACTTGAGGCCTTGAT                                                                            |
| ZCCHC6                                | Circular | GCCCCAAATGATAGATGT                                                                  | TGACAGGAATACCAAATAC                                                                             |
|                                       | Linear   | GCGGCGAAGGTGGTGC                                                                    | ACTGCCATGGCCTTTAGCAT                                                                            |
| MED13L                                | Circular | AGGATTGGGAAATGGTTT                                                                  | TGTGGATCGCTTTGAAGA                                                                              |
|                                       | Linear   | GGTGAGGCGAGCCAGAAATA                                                                | CCTCCGTGACCTGTTTGGTA                                                                            |
| HMGCS1                                | Circular | GACAGAATAGCAGCGGTCTA                                                                | GCGTCCCACTCCAAATGA                                                                              |
|                                       | Linear   | GGACTGTCTTTCTGTGGCTC                                                                | GGCATGGTGAAAGAGCTGTG                                                                            |
| PTGR1                                 | Circular | AGCGTCTCCTGATGGTTA                                                                  | AGAAATGGAGTGCGTTGT                                                                              |
|                                       | Linear   | CAGTCCCAGCCGCCTTC                                                                   | GCTTCAAGCAGGACCTCTCC                                                                            |
| CBFA2T2                               | Circular | GAGTTGCTCATGGAGGTG                                                                  | AAGTTTGTGGCTTCTGG                                                                               |
|                                       | Linear   | GCCTTCCAGCTTGGTCCTG                                                                 | GGGAGGTGAGGATCTGGACT                                                                            |
| LONP2                                 | Circular | TTTAGTGGGCGGCTGGTA                                                                  | AAGCCAAACCTATTGCTACTCC                                                                          |
|                                       | Linear   | TGCAGTACAAATTTTAGATGCTGTG                                                           | GGGCGTATTGCTATAACCCTCT                                                                          |
| Actin                                 | Linear   | TTGTTACAGGAAGTCCCTTGCC                                                              | ATGCTATCACCTCCCCTGTGTG                                                                          |
| <b>Putative circARHGAP35 isoforms</b> |          |                                                                                     |                                                                                                 |
| circARHGAP35.2                        |          | GGAACACTAAGGAAGAAAT                                                                 | CTGGACATGCAGCAAAAAT                                                                             |
| circARHGAP35.3                        |          | CCCGTATAACATGCAGATC                                                                 | CGGTATTACCCGTAAGTC                                                                              |
| circARHGAP35.4                        |          | TTGTAATGTCTCAATGGG                                                                  | AGTGCTGAAATCAGGTCTC                                                                             |
| circARHGAP35.5                        |          | TTCTCTTGTTCCTCCCGC                                                                  | CTGCCACAGTCCCTGCCTG                                                                             |
| circARHGAP35.6                        |          | TGGGTGGGAGGGCGTTGGC                                                                 | AAGCGGGAGTGGGGCAGC                                                                              |
| <b>Northern blotting</b>              |          |                                                                                     |                                                                                                 |
| circARHGAP35-probe                    |          | CAGGCATCCCAGGGTTAT                                                                  | GATCACTAATACGACTCACTATAG<br>GGTTCGGACATCTTGCTTTCTT                                              |
| linear ARHGAP35-probe                 |          | GGCTGGTGCCATGAAGAG                                                                  | GATCACTAATACGACTCACTATAG<br>GGAGGCGTGGAAGTGAGGAA                                                |
| circHIPK3-probe                       |          | CGGCAGCCTTACAGGGTTA                                                                 | TAATACGACTCACTATAGGGAGAC<br>AACTGCTTGGCTCTACTT                                                  |
| <b>gRNA</b>                           |          |                                                                                     |                                                                                                 |
| gRNA targeting ARHGAP35               |          | CACCGTATAACATGCAGATCGACT                                                            | AAACAGTCGATCTGCATGTTATAC                                                                        |
| <b>shRNA</b>                          |          |                                                                                     |                                                                                                 |
| shRNA targeting circARHGAP35          |          | CACCGTGAAGCCACAGGAAGAAATTC<br>AAGATTTCTCCTGTGGCTTCATTTTTT                           | AAACAAAAATGAAGCCACAGGA<br>AGAAATCTTGAATTTCTTCTGTGG<br>CTTCAC                                    |
| <b>Constructs</b>                     |          |                                                                                     |                                                                                                 |
| p-circARHGAP35                        |          | CGGAATTCTGAAATATGCTATCTTACA<br>GGAAGAAATGTTGGCTATTTG                                | CGGGATCCTCAAGAAAAATATAT<br>TCACCTGTGGCTTCAATGTACTCA                                             |
| p-lin-cORF-Flag                       |          | AGAAGATTCTAGAGCTAGCGATGATG<br>GACTACAAAGACCATGACGGTGATTA<br>TAAGGATCATGACATCGATTACA | GCAGATCCTTCGCGGCCGCTCAC<br>TGTTCCACCACCTCTCATGCCAAAT<br>AGCCAACATTTCTTCTGTGGCTTC<br>AATGTACTCAA |

|                             |                                              |                                               |
|-----------------------------|----------------------------------------------|-----------------------------------------------|
| p-lin-FL                    | AGAAGATTCTAGAGCTAGCGATGATG<br>ATGGCAAGAAAAGC | GCAGATCCTTCGCGGCCCGCTCAC<br>AGCGTGTGTTCCGGCTT |
| pTRIPZ-<br>circARHGAP35-ORF | GTGAACCGTCAGATCGCAATGATGGA<br>CTACAAAAGACCA  | CTAAAGTAGCCCTTGAATTTCACT<br>GTTCAACCACCTCTCA  |
| <b>HNRNPL related</b>       |                                              |                                               |
| Up-1                        | GGAGACAAACTCAGCACCAT                         | CCCTGGGACCTTGAAATA                            |
| Up-2                        | CCCACGTTACGTCGCTCCTT                         | CGGGACCTGACCAGCCAAT                           |
| Down-1                      | TTGGGCCTGCCGTGGAAAGGA                        | ATCACACACGCCACCACCAC                          |
| Down-2                      | TCAGAAGGGCTGAGACAG                           | TTTCAAACAGTAAACCACC                           |
| U2                          | ATCGCTTCTCGGCCTTTTGG                         | AGGTTCGATGCGTGGAGTGGA                         |
| HNRNPL mRNA                 | ATGAGCTGGGAGTGAAGC                           | TCAGGAAGCCCAGAGTCT                            |
| <b>Others</b>               |                                              |                                               |
| circGFP                     | GCCGGACACGCTGAACTT                           | TCTCGGCATGGACGAGCT                            |
| circPMS1                    | CTTGAAAGGAGTCGAACTGTTGCC                     | GATCTCCTCATGAGCTTTGGTATCC                     |

**Table S4. Antibodies used in this study**

| ANTIBODIES                       | SOURCE                    | IDENTIFIER      |
|----------------------------------|---------------------------|-----------------|
| p190-A RhoGAP (D8Q6C) (ARHGAP35) | Cell Signaling Technology | Cat. #12164     |
| TFII-I                           | Cell Signaling Technology | Cat. #4562      |
| HA                               | Cell Signaling Technology | Cat. #3725      |
| FLAG                             | Sigma                     | Cat. F1804      |
| $\beta$ -actin                   | Proteintech               | Cat. 60008-1-IG |
| HNRNPL                           | Santa Cruz Biotechnology  | Cat. sc-32317   |

**Table S5. siRNA sequences used in this study**

| siRNA                               | Sequences            |
|-------------------------------------|----------------------|
| circARHGAP35 siRNA                  | GCCACAGGAAGAAATGTTG  |
| both circular/linear ARHGAP35 siRNA | GCACCTTAGTGCAACTCAT  |
| linear ARHGAP35 siRNA               | GCACACATTTACTCTGCAT  |
| TFII-I siRNA-1                      | CGAGAACTATGATCTTGCA  |
| TFII-I siRNA-2                      | GTCGTGTGATGGTAACAGA  |
| TFII-I siRNA-3                      | GTATGAAACAGACGTGTTT  |
| <b>siRNAs for 63 RBPs</b>           |                      |
| CSTF2 siRNA-1                       | GGTTGGACCTGTTGTTAGT  |
| CSTF2 siRNA-2                       | CTGAATGGGCGCGAATTCA  |
| CSTF2 siRNA-3                       | AAGAGGACCCATGCTAGAT  |
| HNRNPA2B1 siRNA-1                   | GGAGAGTAGTTGAGCCAAA  |
| HNRNPA2B1 siRNA-2                   | GCTACGGAGGTGGTTATGA  |
| HNRNPA2B1 siRNA-3                   | AGCTGTTTGTGGCGGAAT   |
| HNRNPF siRNA-1                      | GGAAGTTAGGTCATACTCA  |
| HNRNPF siRNA-2                      | ACCGGTACATTGAGGTGTT  |
| HNRNPF siRNA-3                      | AAGCGACCGAGAACGACAT  |
| DHX8 siRNA-1                        | GCAGTGGGTTCTTCCGTAA  |
| DHX8 siRNA-2                        | GGAGTTTGGTTGTTGCTTA  |
| DHX8 siRNA-3                        | GCACTGAGCTGGACAATCA  |
| HNRNPH1 siRNA-1                     | GGTCCAAATAGTCCTGACA  |
| HNRNPH1 siRNA-2                     | GATCCACCACGAAAGCTTA  |
| HNRNPH1 siRNA-3                     | GTTTCGCAACTCATGAAGAT |
| CLK2 siRNA-1                        | GGAGATGCCTACTATGACA  |
| CLK2 siRNA-2                        | CTATCGGCATTCCCTATGAA |

CLK2 siRNA-3  
 GEMIN2 siRNA-1  
 GEMIN2 siRNA-2  
 GEMIN2 siRNA-3  
 EFTUD2 siRNA-1  
 EFTUD2 siRNA-2  
 EFTUD2 siRNA-3  
 EEF1E1 siRNA-1  
 EEF1E1 siRNA-2  
 EEF1E1 siRNA-3  
 HNRNPL siRNA-1  
 HNRNPL siRNA-2  
 HNRNPL siRNA-3  
 HNRNPH3 siRNA-1  
 HNRNPH3 siRNA-2  
 HNRNPH3 siRNA-3  
 HNRNPK siRNA-1  
 HNRNPK siRNA-2  
 HNRNPK siRNA-3  
 CPSF1 siRNA-1  
 CPSF1 siRNA-2  
 CPSF1 siRNA-3  
 DAZAP1 siRNA-1  
 DAZAP1 siRNA-2  
 DAZAP1 siRNA-3  
 DHX35 siRNA-1  
 DHX35 siRNA-2  
 DHX35 siRNA-3  
 ALYREF siRNA-1  
 ALYREF siRNA-2  
 ALYREF siRNA-3  
 CPSF3 siRNA-1  
 CPSF3 siRNA-2  
 CPSF3 siRNA-3  
 POLR2G siRNA-1  
 POLR2G siRNA-2  
 POLR2G siRNA-3  
 PRPF3 siRNA-1  
 PRPF3 siRNA-2  
 PRPF3 siRNA-3  
 KIF2A siRNA-1  
 KIF2A siRNA-2  
 KIF2A siRNA-3  
 LAMB2 siRNA-1  
 LAMB2 siRNA-2  
 LAMB2 siRNA-3  
 HNRNPM siRNA-1  
 HNRNPM siRNA-2  
 HNRNPM siRNA-3  
 NONO siRNA-1  
 NONO siRNA-2  
 NONO siRNA-3  
 PPARGC1A siRNA-1  
 PPARGC1A siRNA-2  
 PPARGC1A siRNA-3  
 GAGAGCATCTAGCCATGAT  
 GATCGAAGCAGCTCAATGT  
 GTAGAGCCTTGCGACTTGA  
 AAAGTCCTGGAATAGATTA  
 GATGGAGCCTTACTACTTT  
 GAGCAGACATTACCTGTTA  
 CAAGGCTCTTCTGGTTCA  
 GCAACATCTGTCTAGTGTT  
 ACCTGACAGTTCAAGAAAA  
 CACACAGAGGTAGGGAAC  
 GACGGGTCTTGCAGTTACA  
 GTCAGTCATACGGGTTGGA  
 GTCCATACCCTTACTCT  
 GGCTACGGAAGAGATGGAA  
 ATGGGATAACATTGACGAT  
 GACCATATGATAGACCAAT  
 GGATCCGAAGATCGGATCA  
 ATCCCAATTTTACGATGA  
 AAGGTGGTCAGCGGATTA  
 TGATCAGCGTCAAGAAGTT  
 CCCACTATGTGGCTTACCA  
 ACCGCAACCTCATGGTGTA  
 TCACGGAGGTAGTCATGAT  
 ACACGCTAGATGGCCGAAA  
 AAAGGACCCAGGAGCGATA  
 GCATGAGAATTGCAGAGTT  
 GCAGCGAGGTTTCATTCTA  
 CAAAGACTGTCGCCTAACT  
 GCACGATCTTTTCGACAGT  
 GAGGTGGCATGACTAGAAA  
 ACGACATCATTAAACTGAA  
 GGACCCATATCCATGAGAA  
 GTAACACTGTCCACGATAT  
 GCAGTGACCTTAAACTTCA  
 CCACCATGTTACAAGACAA  
 GCTCCCTGATGGACGATTA  
 GCCGAGGCTTTGTCCTTTA  
 CTGGGAGTATATCTTACCA  
 GGAGTAAAGAAGCGACGAA  
 GGAACAATTCAAGCAACA  
 TGGTGATGTTTCGTTCAATA  
 TTCCGTGCAAGTAAACTCA  
 TAAGAATGACCCTCCTTCA  
 CAAGGATGATCGCATCCAA  
 GTGCAACCCTCAAGGTTCA  
 CCTACAAGCTGCATCTGAA  
 GGTGTGGCGTGGTTAAGTT  
 GAGAGATTGACGTTCAAT  
 GAAGGCCTGCCAGATATTT  
 GAAGGCTCCTTCCTGCTAA  
 CAGGCGAAGTCTTCATTCA  
 AGGTCATGCTAATGAGACA  
 CACCACTCCTCCTCATAAA  
 CAGAGACACTAGACAGTCT  
 GGCACGCAATCCTATTCAT

|                  |                      |
|------------------|----------------------|
| PRPF6 siRNA-1    | GAAGCGGGTCTTCGGAAA   |
| PRPF6 siRNA-2    | GGATCTAAATGACACCAAT  |
| PRPF6 siRNA-3    | CTCGGAACCTTATCATGAA  |
| PRPF40B siRNA-1  | GGCAAACCTTATTACTATA  |
| PRPF40B siRNA-2  | CCACCTGGATGGAGCTATA  |
| PRPF40B siRNA-3  | GCAATATCCAGGCCCTAAA  |
| LSM4 siRNA-1     | CCGACGAGATCATCGACAT  |
| LSM4 siRNA-2     | ACAACCTGGATGAACATTAA |
| LSM4 siRNA-3     | GCAGCACCATCAAGTACCT  |
| PPIH siRNA-1     | GCATGAAGATCGAGCTCTT  |
| PPIH siRNA-2     | GCAGACGTTGTGCCTAAGA  |
| PPIH siRNA-3     | GGGTTCCAATAGGATACAA  |
| PRPF31 siRNA-1   | GCTACGAACTGAAGGATGA  |
| PRPF31 siRNA-2   | GCCAAGCTATGGGATAGTA  |
| PRPF31 siRNA-3   | CAAGCAAGCCAAAGCTTCA  |
| HNRNPR siRNA-1   | AGGTAGAGCTGGCTATTCA  |
| HNRNPR siRNA-2   | ACTGTCCGGTCAGAATAGA  |
| HNRNPR siRNA-3   | AGGGTTTGGTGGACGTTAT  |
| LSM2 siRNA-1     | TCTCAACATCAAACCTAACT |
| LSM2 siRNA-2     | GTGTCACAGACCCTGAGAA  |
| LSM2 siRNA-3     | GTGGAACCCTCCATTCTGT  |
| PHF5A siRNA-1    | AGAGATGGCTGCCCAAAGA  |
| PHF5A siRNA-2    | GCGCATATGTGATGAGTGT  |
| PHF5A siRNA-3    | GGTCTCTGATGCCTATTAT  |
| HNRNPLL siRNA-1  | GAACACCCTTCTTCGTTTA  |
| HNRNPLL siRNA-2  | CGTGTACATTGCTGGTCAA  |
| HNRNPLL siRNA-3  | GTACCAGCAGCTACAAAGA  |
| LSM7 siRNA-1     | CGATCCGGGTAAAGTTCCA  |
| LSM7 siRNA-2     | ACGTCCGTGGTGCTAATCT  |
| LSM7 siRNA-3     | ACCCACTCCTCAACCTTGT  |
| SERPINC1 siRNA-1 | CCAACAGGGTGACTTTCAA  |
| SERPINC1 siRNA-2 | GAGGACGGCTTCAGTTTGA  |
| SERPINC1 siRNA-3 | GAGTCGTGTTTCAGCATCTA |
| SNRPA siRNA-1    | CAGATATCATTGCCAAGAT  |
| SNRPA siRNA-2    | TCGTGGAGTTTGACAATGA  |
| SNRPA siRNA-3    | CTGAGAATCCACCGAATCA  |
| PTEN siRNA-1     | GGAATATCTAGTACTTACT  |
| PTEN siRNA-2     | GGTGTAAATGATATGTGCAT |
| PTEN siRNA-3     | ACCGCCAAATTTAATTGCA  |
| SNRPB siRNA-1    | TGGTCTCAATGACAGTAGA  |
| SNRPB siRNA-2    | CTGGTATGAGACCTCCTAT  |
| SNRPB siRNA-3    | GCCAAAGAACTCCAAACAA  |
| SATB1 siRNA-1    | GGTACGCGATGAACTGAAA  |
| SATB1 siRNA-2    | GTCCCTCAATTGGTCAACCA |
| SATB1 siRNA-3    | GGGCTCGTATCAACACCTA  |
| SFPQ siRNA-1     | CCAGAAATTTCCACCTCTA  |
| SFPQ siRNA-2     | GGATGATCGTGGAAAGATCT |
| SFPQ siRNA-3     | GGAGGAACGACGTAGAAGA  |
| SF3B4 siRNA-1    | GGAAGCCAATACGGGTGAA  |
| SF3B4 siRNA-2    | GTCTATCACCGTATCTTA   |
| SF3B4 siRNA-3    | GCATCAGCTCACAACAAAA  |
| SF3B2 siRNA-1    | GGACGTGTTTGGAAACCAAT |
| SF3B2 siRNA-2    | GAGACACCTCAGCTCTTCA  |
| SF3B2 siRNA-3    | GGAAGCGTAGGAACCGAAA  |
| SRSF11 siRNA-1   | GGATACCTCTAGTAAAGAA  |

|                |                       |
|----------------|-----------------------|
| SRSF11 siRNA-2 | GAGCAAACCTTGAACCTCTCA |
| SRSF11 siRNA-3 | GGCACAAGATCTCCTAAAA   |
| SRSF10 siRNA-1 | GACGGCAGATTGAAATACA   |
| SRSF10 siRNA-2 | GTCGGTCTTTTGATTACAA   |
| SRSF10 siRNA-3 | GACAGATACAGACGTTCTA   |
| SNRPC siRNA-1  | CTCAGAGCCTGATTGACAA   |
| SNRPC siRNA-2  | GCTGCATTTCAACAAGGAA   |
| SNRPC siRNA-3  | CTCCCATGATGCCAATGAT   |
| SNRPD2 siRNA-1 | GCCGCAACAATAAGAAACT   |
| SNRPD2 siRNA-2 | GACTGAGGTACCCAAGAGT   |
| SNRPD2 siRNA-3 | GCGAGAGGAGGAGGAATTT   |
| RBMXL1 siRNA-1 | TGAGAAAGCTCTTGAAACA   |
| RBMXL1 siRNA-2 | GATGGTGGATATTCCATGA   |
| RBMXL1 siRNA-3 | GGAGGAAGAGCTCCTCTAT   |
| PTBP2 siRNA-1  | GTGTTACTCTGTCTAAACA   |
| PTBP2 siRNA-2  | GCAGAAGAGGATCTACGAA   |
| PTBP2 siRNA-3  | GAGAGGGACTTGATGATCA   |
| RALY siRNA-1   | AGACCATCTTCTCTAAGTA   |
| RALY siRNA-2   | GCAGCATCTGCCATATACA   |
| RALY siRNA-3   | GAGTCTTCATTGGAAACCT   |
| SRSF2 siRNA-1  | CACGAAGGTCCAAGTCCAA   |
| SRSF2 siRNA-2  | GTGTCCAAGAGGGAATCCA   |
| SRSF2 siRNA-3  | TCGGTCTCCAGATCTCGTT   |
| SRSF4 siRNA-1  | GAATCACGCTCCAGATCAA   |
| SRSF4 siRNA-2  | GACTTATTGTGGAGAATTT   |
| SRSF4 siRNA-3  | CGATCTCGGTCCAAGTCTA   |
| SRSF6 siRNA-1  | GACCACCTGTTTCGTACAGA  |
| SRSF6 siRNA-2  | AGGCGATCTTACTCTGGAA   |
| SRSF6 siRNA-3  | GCAGATCTAAGGATGAGTA   |
| SRSF7 siRNA-1  | GGGACATTATGCTTATGAT   |
| SRSF7 siRNA-2  | CCTCGACGATCAAGATCTA   |
| SRSF7 siRNA-3  | CGAAGATCCTAGAGATGCA   |
| TRA2B siRNA-1  | GGACTACTATAGCAGATCA   |
| TRA2B siRNA-2  | GGCGTAGGATCAGAGTTGA   |
| TRA2B siRNA-3  | CGGTCACCTTCTCCTTACT   |
| SRSF3 siRNA-1  | CTATGTGGCTGCCGTGTAA   |
| SRSF3 siRNA-2  | CGAGATGATTATCGTAGGA   |
| SRSF3 siRNA-3  | CGATCTAGGTCAAATGAAA   |
| THOC2 siRNA-1  | GGGCAAGATTTATCTGGAA   |
| THOC2 siRNA-2  | GGACAAGCTTCTTGAAGAA   |
| THOC2 siRNA-3  | GCCGCAAAATTGATACTCA   |
| USP39 siRNA-1  | TCAAGAGATTC ACTAAGAA  |
| USP39 siRNA-2  | GCAGTTGTACTTTGCAGTA   |
| USP39 siRNA-3  | TCCCGGGCATATGATGGTA   |
| SUGP2 siRNA-1  | CACCCAGAGTTGATAATGA   |
| SUGP2 siRNA-2  | GCACTAACCAATCCAGAA    |
| SUGP2 siRNA-3  | GCTTTGACATCATAGATAA   |
| TUBG1 siRNA-1  | GGTCCAGCCTTACAATTCA   |
| TUBG1 siRNA-2  | GACGCAGAATGCAGACTGT   |
| TUBG1 siRNA-3  | GAACCTGTCGCCAGTATGA   |
| THOC5 siRNA-1  | GTGCAGGAGTACCTGTTTA   |
| THOC5 siRNA-2  | GGGTTTCAGTTGGACGACAA  |
| THOC5 siRNA-3  | GAGAGTGCCTATCTAACAA   |
| SRSF9 siRNA-1  | GGTCGAGTATCTCAGAAAA   |
| SRSF9 siRNA-2  | ACACCAAAATCCGCTCTCA   |

|               |                     |
|---------------|---------------------|
| SRSF9 siRNA-3 | GGAATATGCCCTGCGTAAA |
| SUGP1 siRNA-1 | GTAGCTTCTTGCAGCAGTT |
| SUGP1 siRNA-2 | GCAGGGAATTCCTCTACTA |
| SUGP1 siRNA-3 | GAGCCTGACTACTCAGAGT |
| UPF3B siRNA-1 | GATGCAGCTTTACCAACCA |
| UPF3B siRNA-2 | TCAGGAATATCCCGCTATA |
| UPF3B siRNA-3 | GCGCATACTTCGAGAAAGA |

**Table S6. Sequences of circARHGAP35 RNA and protein**

**circARHGAP35 RNA:**

GAAGAAATGTTGGCTATTGGCGATGAGAGGTGGTGAACAGTGCACCATACTGGTATACAACACTATGGGACCTGGCATTITTTGCTGC  
 ATGTCCAGCCACCCCACTAATAATGTAGGAAGCTGTCTGGTCCATTGGAAACACTAATCTGATCTCAGAAAGTGGCTGATCGTGGC  
 AGGATGTGTCGACGATGATGATGGCAAGAAAGCAAGATGTCGGAATCCACCTACAACATCAGTGTGGTGGGATTATCTGGGACCG  
 AGAAGGAAAAGGGCCAGTGTGGGATTGAAAAGTCTTGTTTGTGCAACCGCTTCGTGCGCCGAGTGTGACGAGTTTCACTTGGACC  
 ATACCTCCGTCACGACCAGTGTGAGGGGCGAGTGGTCAATAATGACCACCTTCTCTACTGGGGAGAAGTTAGCCGCTCCCT  
 GGAGGATTGTGGAAATGTAAGATGCACATTTGTGGAGCAGACTGAATTTATTGATGATCAGACTTTTCAACCTCATCGAAGCAGCG  
 CCTGCAGCCCTATATCAAGAGAGCTGCTGCGACCAAGCTTGCATCAGCTGAAAACTCATGTACTTTTGCAGTACCAGCTGGGGCT  
 GGAGCAGGACTTTGAGCAGAAAACAAATGCCAGACGAAAAGTCTGGTGTGATGGTTCCTTCTTGGTATTGATGTTAGCAGGGGCAT  
 GAATAGGAACCTTTGATGACCAAGTGTGTTGAGCGGTACATTAGAGATGCACATACTTTTGCCTTAAGCAAAAAGAACTCCAGGTTGTGGAGAC  
 CTCAGCGAGATCCAATGTAAACGTGGACTTGGCTTTCAGCACCTTAGTGAACCTATTGATAAAAGTCCGGGAAAGACAAAAATCAT  
 TCCTTATTTGAAGCTCTCAAGCAGCAGAGTGCAGCAGATAGTACAGCAAAAAGACAAGTATGAGTGGCTGGTGTGAGTGCATTGTGAA  
 AACCACAATGTAAGACTGCTGAGTGTGAGCCGAAAAGATGCAAGGCTCCAGGCTTCCAGAATACCAGGACTATGTCTACCTGGAAAGGACT  
 AGAAAGCAAGAAGCTGTTTCTACAGCACATCCACCGCTCAAGCATGAGCATATCGAGCGTAGGAGAAAGCTGTACTTGGCAGCC  
 CTGCCATTAGCTTTTGAAGCTTTATACCTAATCTAGATGAAATAGACACCTAAGCTGCATAAAAGCCAAAAGCTTTAGAAACC  
 AAGCCAGAATCTTGAAGTGGTGTGTTGCTTGAAGAGACCCATGGGATGCCACCAGTACATTGCAACATGGAAAACGAACGG  
 ATTCCCTTTGATTTAATGGATACCGTCCCTGACAGCAGTATACGAGGCCACTTAGAGAAGCTGAGGAACGAAAAGAAAAGAGTT  
 GAGATGCGAAGGGCGTTAAAGAAAACCTGGAGACTTCTCTTTCATAACTCCCGGAAAGCTTGGGAAGAGGCCCGTAGTTTATT  
 ATGAATGAGGATTTCTACCAGTGGCTGGAGGAATCTGTATACATGGATTTTATGGCAAAACCAAAAAGCAAAATATAGATAAAGCA  
 AAGGAAGAATTCAGGAGTTGCTTTTGGAAATATTCAGAAATGTTTTATGAACCTGGAGCTGGATGCTAAGCCAGCAAGGAGAAGATG  
 GGTGTTATTCAGGATGTTCTGGGAGAGGAACAGCGATTTAAAGCATTACAAAAGCTCCAAGCAGAGCGTGTATGCCCTTATTCTGAAA  
 CACATTCATTTGTGTACACCCAACAAGGAGACATGCCCCAGCTGCCAGCTTGTGTGGACGCTAAGATTGAGCAGTGTATTAGTT  
 CTCGGTTATCCGGCCGTGACCCGAATCAGAAAAATTCCTCTGACCCCTAACATTGATAGAATCAACTGGTTATATTGGGCAA  
 AGACGGCTTGGCCGAGAGTGGCCAAATGAGATTTCGAGCTTTTGTACAAAATGATGACAAGTATGTGATGACAAGTATGTAATAATGTA  
 GCTTTCCTGAGGCAATAGAGGGGAATGTACAGGCTTCTGTGAACTCTTCCAGACGCCAACATTCAGCCCCACGGCTGTCTCTGC  
 CTTTACAATTCAAAGGAATCGCTATCTATGTAGTGGAAAGTATAGAGAAGAGTAGAGAGTCCACGCTGGGCGGGCGGATAATCAT  
 TTAGTCCATCTCCCTTACATTAATTTTGGTTAACAAGAGAGAGACACACTCCAGGAGACTCTGCATAGCTTAATACAGCAAGGT  
 CAACAAATGTAGCAAACTTCAAGTGTCTTCTCGACCCTGCTTCTGCTGGCATTGGTTACGGACGCAACATTAATGAAAAGCAAA  
 TCAGTCAAGTTTGAAGGGACTCCTGGACTCTAAGCGTAACTTAAACCTGGTCAAGTCTACTGCTAGCATCAAAGATTGGCTGATGT  
 TGATCTGCCAATTTATGTGTCTGATGTGGAGATCTTTTGTGAGATGACATACCTTTTCTGCTCTTCAAGTCTTCAAGCTCTATG  
 AATCTTCCGAAATTTGGAAGCAACAACCTCTGTTTTACTGAACTCAACTCCGACTGCACAAGAACGCGGATGCTCCGCTGCTTCTT  
 ATACCATTCTCTTTAGCATCAGAAAGAGCCGGTTGGTTCATGGGTACATTGTTTTTATTCAGCAAACGTAAGGCCTCTTGGGTA  
 TGTTACGTGCTTCTTGTGAAGTGCAGGATATTATCCCTATTCAGCTGTAGCACTCACTGATGGCGCTGTAGATGTCTGGACAAT  
 GACTTAAGTAGGGAACGCTAAGTGCAGGAGGAGATTGCTCAAGAAATTTGACGGAAGTTTCAAGGAGTTCACAGGAAAGTTCAAGCAAC  
 CCAGCATAAACTTGAGATCTTTCACCCATTTTTTAAAGATGTGGTGGAAAAAAGAACAATAATCGAGGCTACTCATATGTACGATAA  
 TGCTGCGGAGGCTGTAGCACCACGAAGAGGTGTTAACTCCCGGGCAGGATCACCCTGCTGCAACTCAAACCTGCAGGATTG  
 AGAAGAAGATATCGAGCCATCTTACAGCCTGTTTCGAGAAGACACATCACTGCCTTCTGTCCAAAGACCAATTTCAAGCTCTCTATG  
 GAACCTGAGGAAATGATGGCTGTCTTTCATTAATGAGCAATTTGAGAGTAAACTGAACAACAAGTCAACTCCGCTGCTGCTCAACCA  
 AAGCCTCTGTCCATTTTGAATTACAAAGGGGATCTATCTTATTTAGACCAAGCCATAGGATGGACAGAGGAAGTCTGTGTCT  
 TTAGCCCTGGCTCGCTCAGGATGGGTTTGTATCTTCTGACTATGCTGAACCCATGGATGCTGTGGTGAAGCCAAAGAAATGAAGAA  
 GAAAACATATCTCGCTGCCATGACAGCACCCAAAGCAAAATCACTACCATTCCGAATATCAACAAGCCAGCTCAACGGCAG  
 CGGGAATGGTTCTGACAGTGAATGGACACCAGCTCTCTAGAGCGAGGGCGCAAGGTTTCCATCGTGTAGCAAGCCAGTGTGTACAG  
 GACGAGATGACCCCGCTGGGGCGGTTGTAGTTACCGGACCAGCTTTCAGCGTGGGGAGTGTATGATGAGCTGGGGCCATCCCGGA  
 AGAAAAGAGGAGATCAGGCAATCCAGGGTTATAAAGGGGACAATGCTGTCTTCCATACGAAACAGCAAGACCCCGGGAGGAG  
 GAATATTCTTCGACGCTAAGGAGGAACACTAAGAAAACCAAGGCTTCCATCAACAAGCCAGCTCAAGGAGGAGTA  
 ACTATTTTGGGGTGCCTTAAACAATGTCGTGACTCCAGAGAAGCCGATCCCCATTTTTATTGAAAGATGTATTGAGTACATTGAAGC  
 CACAG

**circARHGAP35 protein:**

MMMARKQDVRIPTYNISVVLSGTEKEKGQCGIGKSCLCNRFVRPSADEFHLDHTSVLSTSDFGGRV VVNDHFLYWGEVSRSLDCEVCK  
 MHIVEQTEFIDDQTFQPHRSTALQPYIKRAAATKLASAEKLMYFCTDQLGLEQDFEQKMPDGLKLLVDGFLLDVSRGMNRFDDQLKF  
 VSNLYNQLAKTKKPIVVVLTCKDEGVERYIRDAHTFALSCKNLQVVETSARSNVNVDLAFSTLVQLIDKSRGKTKIIPYFEALKQSQSIAT  
 AKDKYEWLVSRIVKNHNENWLSVSRKMQASPEYQDYVYLEGTQKAKKFLQHIHRLKHEHIERRRKLKLAALPLAFEALIPNLDEIDHLS  
 CIKAKKLETKPEFLKWFVVELETPWDATSHIDNMENERIPFDLMDTVPAEQLYEAHLEKLRNERKRVEMRRAFKENLETSFPITPGKPWE  
 EARSFIMNEDFYQWLEESVYMDIYGKHQKQIIDKAKEEFQELLELSYSELFYELELDAKPSKEKMGVIQDVLGEEQRFKALQKLQAERDALI  
 LKHIHFVYHPTKEKPCACVDAKIEHLISSRFIRPSDRNQNSLSDPNIDRINLVILGKDGDLARELNEIRALCTNDDKYVIDGKMYELSLR  
 PIEGNVRLPNSFQTPTFQPHGCLCLYNSKESLSYV VESIEKSRESTLGRDRNHLVHLPLTLILVNRKGDTSGETLHSLIQQQIASKLQCVF  
 LDPASAGIGYGRNINEKQISQVLKGLLDSCRNLNLVSTASIKDLADVLDLRIVMCLMCGDPFSADDILFPVLQSQTKSSHCSSNNSVLELPL  
 IGLHKKRIELSVLSYHSSFSIRKSLVHGVIYFYSAKRKLASLAMLRAFLCEVQDIIPQLVALTGDGAVDVLNDLSREQLTEGEIAQEIDGRF  
 TSIPCSQPQHKLEIFHPFFKDVVEKKNHIEATHMYDNAEACSTTEEVFNSPRAGSPLCNSNLQDSEEDIEPSYSLFREDTSLPSLSKDHLS  
 MELEGNLDFMNSFESKLNKVPVPPVKPPVHFEITKGDLSYLDQGHDRDQQRKSVSSSPWLPQDGFDPDSDY AEPMDAVVKPRNEENI  
 YSVPDSTQGGKIITIRNINKAQSNNGSNGSDSEMDTSSLERGRKVSIVSKPVLRYRTRRLGRFASYSFVSVDDELGPirkKEEDQASQG  
 YKGDNAVIPYETDEDRRRNRILRSLRRNTKPKPKPRPSITKATWESNYFGVPLTTVVTEKPIPIFIERCIEYIEATGRNVGLAMRGGEQ-

The start codon (ATG) and stop codon (TGA) are shown in blue letters. The red letters represent the specific sequence of circARHGAP35 protein.
